# Supplementary material
Source: Springer Nature journal article supplement (https://www.springermedizin.de/resource/supplementary/12889_2013_5788_MOESM1_ESM.pdf/9496732)
Supplement: MOESM1 [file 9496732]

**Web Table 1: Risk of bias in included studies**

| <b>Parameter</b>              | <b>Nepal trial</b>                                                                                                                                                                                                                                      | <b>Bangladesh trial</b>                                                                                                                                                                    | <b>Pakistan trial</b>                                                                                                                                                                      |
|-------------------------------|---------------------------------------------------------------------------------------------------------------------------------------------------------------------------------------------------------------------------------------------------------|--------------------------------------------------------------------------------------------------------------------------------------------------------------------------------------------|--------------------------------------------------------------------------------------------------------------------------------------------------------------------------------------------|
| <b>Sequence generation</b>    | <p><b>Low risk</b></p> <p><b>Quote:</b> “Sectors (clusters) were randomised with a computerized random number generator, with assignment blocked on tertiles of sector-wise infant mortality risk estimated with data from a previous NNIPS study.”</p> | <p><b>Low Risk</b></p> <p><b>Quote:</b> “Randomization was done by generating random allocation sequences in STATA (version 10 9.2)”</p>                                                   | <p><b>Low risk</b></p> <p><b>Quote:</b> “Using a 2x2 factorial design, the clusters were randomly allocated to one of the four groups using computer-generated random numbers”</p>         |
| <b>Allocation concealment</b> | <p><b>Low Risk</b></p> <p><b>Comment:</b> Since it is a cluster randomized trial, allocation concealment should not be an issue as in this design all clusters are randomized at once.</p>                                                              | <p><b>Low Risk</b></p> <p><b>Comment:</b> Since it is a cluster randomized trial, allocation concealment should not be an issue as in this design all clusters are randomized at once.</p> | <p><b>Low Risk</b></p> <p><b>Comment:</b> Since it is a cluster randomized trial, allocation concealment should not be an issue as in this design all clusters are randomized at once.</p> |
| <b>Blinding</b>               | <p><b>Low risk</b></p> <p><b>Quote:</b> “Study investigators, analysts, project field workers, and participants were masked to the chlorhexidine and</p>                                                                                                | <p><b>High Risk</b></p> <p><b>Quote:</b> “Workers and participants in the study were not masked to group allocation.”</p>                                                                  | <p><b>High Risk:</b></p> <p><b>Quote:</b> “The CHWs maintained close liaison with TBAs, were informed of all pregnancies 22 and</p>                                                        |

| Parameter                   | Nepal trial                                                                                                            | Bangladesh trial                                                                                                       | Pakistan trial                                                                                                         |
|-----------------------------|------------------------------------------------------------------------------------------------------------------------|------------------------------------------------------------------------------------------------------------------------|------------------------------------------------------------------------------------------------------------------------|
|                             | to the soap and water treatments.”                                                                                     |                                                                                                                        | provided TBAs with birth kits as per requirement”<br>Comment: Most probably not done                                   |
| Missing data                | <b>Low risk</b><br><b>Comment:</b> Number and reasons for those excluded and loss to follow up were given in the text. | <b>Low risk</b><br><b>Comment:</b> Number and reasons for those excluded and loss to follow up were given in the text. | <b>Low risk</b><br><b>Comment:</b> Number and reasons for those excluded and loss to follow up were given in the text. |
| Selective outcome reporting | <b>Low risk</b><br><b>Comment:</b> All the <i>a priori</i> mentioned outcomes in protocol were reported.               | <b>Low risk</b><br><b>Comment:</b> All the <i>a priori</i> mentioned outcomes in protocol were reported.               | <b>Low risk</b><br><b>Comment:</b> All the <i>a priori</i> mentioned outcomes in protocol were reported.               |
